# Supplementary material
Source: PubMed Central journal article supplement (PMC5808431)
Supplement: NIHMS917460-supplement-supplement_1.pdf [file NIHMS917460-supplement-supplement_1.pdf]

***Clostridium difficile* Infections after Cardiac Surgery: A Multi-Institutional Prospective Cohort Study**

Katherine A. Kirkwood, MS; Brian C. Gulack, MD, MHS; Annetine C. Gelijns, PhD; Michael E. Bowdish, MD; Nishit Fumakia, MD; Ravi K. Ghanta, MD; Jesse M. Raiten, MD; Anuradha Lala, MD; Alexander Iribarne, MD, MS; Joseph S. Ladowski, MD; Giampaolo Greco, PhD; Eugene Blackstone, MD; Michael K. Parides, PhD; Alan Moskowitz, MD; Keith Horvath, MD

**Online Supplementary Material**

## **Supplemental Material**

### **Appendix EI: CTSN Investigators**

## Appendix EI: CTSN Investigators

The members of the Cardiothoracic Surgical Trials Network (CTSN) involved in this study were as follows:

**National Heart, Lung and Blood Institute:** Marissa A. Miller, Wendy C. Taddei-Peters, Dennis Buxton, Ron Caulder, Nancy L. Geller, David Gordon, Neal O. Jeffries, Albert Lee;

**National Institute of Neurological Disorders and Stroke:** Claudia S. Moy;

**Canadian Institutes of Health Research:** Ilana Kogan Gombos, Jennifer Ralph;

**Network Chairs:** *Christiana Care Health System*, Timothy J. Gardner, (Chair); *Brigham and Women's Hospital*, Patrick T. O'Gara, (Co-Chair);

**Data Coordinating Center:** *International Center for Health Outcomes and Innovation Research at Icahn School of Medicine at Mount Sinai*, Annetine C. Gelijns, Michael K. Parides, Deborah D. Ascheim, Alan J. Moskowitz, Ellen Moquete, Eric A. Rose, Melissa Chase, Yingchun Chen, Rosemarie Gagliardi, Lopa Gupta, Edlira Kumbarce, Ron Levitan, Karen O'Sullivan, Milerva Santos, Alan Weinberg, Paula Williams, Carrie Wood, Xia Ye;

**Core Clinical Site Investigators:** *Cleveland Clinic Foundation*, Eugene H. Blackstone (PI), A. Marc Gillinov, Pamela Lackner, Leoma Berroteran, Diana Dolney, Suzanne Fleming, Roberta Palumbo, Christine Whitman, Kathy Sankovic, Denise Kosty Sweeney; *NHLBI Clinical Research Scholars:* Gregory Pattakos, Pamela A. Clarke; *Columbia University*, Michael Argenziano (PI), Mathew Williams, Lyn Goldsmith, Craig R. Smith, Yoshifumi Naka, Allan Stewart, Allan Schwartz; Daniel Bell, Danielle Van Patten; *Duke University*, Peter K. Smith (PI), Stacey Welsh, John H. Alexander, Carmelo A. Milano, Donald D. Glower, Joseph P. Mathew, J. Kevin Harrison; *NHLBI Clinical Research Scholars:* Mark F. Berry, Cyrus J. Parsa, Betty C. Tong, Judson B. Williams; *East Carolina Heart Institute*, T. Bruce Ferguson (PI), Alan P. Kypson, Evelio Rodriguez, Malissa Harris, Brenda Akers, Allison O'Neal; *Emory University*, John D. Puskas (PI), Vinod H. Thourani, Robert Guyton, Jefferson Baer, Kim Baio, Alexis A. Neill; *Montefiore-Einstein Heart Center, New York, NY*, Robert E. Michler (PI), David A. D'Alessandro, Joseph J. DeRose, Jr., Daniel J. Goldstein, Ricardo Bello, William Jakobleff, Mario Garcia, Cynthia Taub, Daniel Spevak, Roger Swayze; *Montreal Heart Institute*, Louis P. Perrault (PI), Arsène-Joseph Basmadjian, Denis Bouchard, Michel Carrier, Raymond Cartier, Michel Pellerin, Jean François Tanguay, Ismael El-Hamamsy, André Denault, Jonathan Lacharité, Sophie Robichaud; *NIH Heart Center at Suburban Hospital*, Keith A. Horvath (PI), Philip C. Corcoran, Michael P. Siegenthaler, Mandy Murphy, Margaret Iraola, Ann Greenberg; *University of Pennsylvania*, Michael A. Acker (PI), Y. Joseph Woo, Mary Lou Mayer; *University of Virginia*, Irving L. Kron (PI), Gorav Ailawadi, Karen Johnston, John M. Dent, John Kern, Jessica Keim Sandra Burks, Kim Gahring;

**Protocol Review Committee:** David A. Bull (Chair); Patrice Desvigne-Nickens, Executive Secretary; Dennis O. Dixon, Mark Haigney, Richard Holubkov, Alice Jacobs, Frank Miller, John M. Murkin, John Spertus, Andrew S. Wechsler;

**Data and Safety Monitoring Board:** Frank Sellke (Chair); Cheryl L. McDonald, Executive Secretary; Robert Byington, Neal Dickert, Dennis O. Dixon, John S. Ikonomidis, David O. Williams, Clyde W. Yancy;

**Medical Monitors:** James C. Fang, Wayne Richenbacher;

**Overall Event Adjudication Committee:** Vivek Rao (Chair); Karen L. Furie, Rachel Miller, Sean Pinney, William C. Roberts;

**Infection Event Adjudication Committee:** Rachel Miller (Chair); Shirish Huprikar, Marilyn Levi.
